# Supplementary material for: Bioinspired catalysis and bromoperoxidase like activity of a multistimuli-responsive supramolecular metallogel: supramolecular assembly triggered by pi–pi stacking and hydrogen bonding interactions
Source: Royal Society of Chemistry journal article supplement (doi:10.1039/c9nj05732c), 2020-01-01
Supplement: c9nj05732c1.pdf [file c9nj05732c1.pdf]

# **Bioinspired catalysis and Bromoperoxidase like activity of Multistimuli-Responsive Supramolecular Metallogel: Supramolecular assembly triggered by pi-pi stacking and hydrogen bonding interactions**

Sunshine Dominic Kurbah and Ram A. Lal

Centre for Advanced Studies, Department of Chemistry, North-Eastern Hill University, Shillong-793022, India.

## **Supporting information**

1. Optimization of reaction conditions for the oxidative bromination catalyzed by VO<sub>2</sub>-hydrogel ..... Table S1.
2. <sup>1</sup>H <sup>13</sup>C NMR spectra of 5-bromo-2-hydroxybenzaldehyde ..... Fig S1 & S2.
3. <sup>1</sup>H <sup>13</sup>C NMR spectra of 2-bromo-1-(2-hydroxyphenyl) ethan-1-one ..... Fig S3 & S4.
4. <sup>1</sup>H <sup>13</sup>C NMR spectra of ethyl 5-bromo-2-hydroxybenzoate ..... Fig S5 & S6.
5. Fig S7. <sup>1</sup>H NMR of ligand ..... Fig S7
6. <sup>1</sup>H NMR of complex ..... Fig S8
7. Experimental and simulated powder XRD patterns of VO<sub>2</sub>-L metallogel .... Fig S9
8. Variation of storage modulus (G') and loss modulus (G'')  
With (a) frequency (b) Shear stress..... Fig. S10
9. SEM image of VO<sub>2</sub>-L metallogel and its corresponding  
EDS spectrum .....Fig S11

Table S1. Optimization of reaction conditions for the oxidative bromination catalyzed by VO-<sub>2</sub>-L hydrogel.

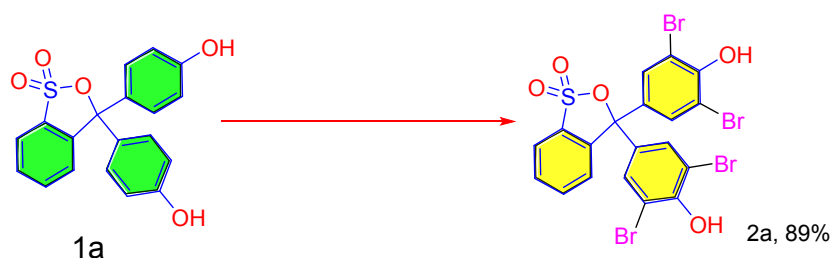

| Entry | Molar ratio  |                  |                                  |                          | Temperature (°C) | Time (min) | Isolated yield (%) |
|-------|--------------|------------------|----------------------------------|--------------------------|------------------|------------|--------------------|
|       | V-complex: S | S: KBr           | Br:H <sub>2</sub> O <sub>2</sub> | HClO <sub>4</sub> (mmol) |                  |            |                    |
| 1     | 1:10         | 1:2              | 1:1                              | 2                        | RT               | 40         | 90                 |
| 2     | 1:10         | 1:4              | 1:1                              | 2                        | RT               | 30         | 89                 |
| 3     | 1:10         | 1:4              | 1:2                              | 2                        | RT               | 35         | 94                 |
| 4     | 1:10         | 1:4              | 1:4                              | 2                        | RT               | 25         | 97                 |
| 5     | 1:20         | 1:4              | 1:4                              | 2                        | RT               | 50         | 96                 |
| 6     | 1:05         | 1:4              | 1:4                              | 2                        | RT               | 20         | 92                 |
| 7     | 1:10         | 1:4              | 1:4                              | 2                        | 40               | 30         | 93                 |
| 8     | 1:10         | 1:4              | 1:4                              | 2                        | 55               | 30         | 95                 |
| 9     | 1:10         | 1:4              | 1:4                              | 2                        | 70               | 30         | 98                 |
| 10    | 1:10         | 1:4 <sup>b</sup> | 1:4                              | 2                        | RT               | 60         | 94                 |
| 11    | 1:10         | 1:4              | 1:4                              | 4                        | RT               | 15         | 96                 |
| 12    | -            | 1:4 <sup>c</sup> | 1:4                              | 4                        | RT               | 30         | 15                 |
| 13    | -            | 1:4 <sup>d</sup> | 1:4                              | 4                        | RT               | 30         | 28                 |

<sup>a</sup>All the reactions were carried out using 0.129 g catalyst (0.1 mmol), phenol red as substrate, KBr as bromide source and H<sub>2</sub>O (5 mL) as solvent unless stated.

<sup>b</sup>Et<sub>4</sub>NBr used as bromide source.

<sup>c</sup>Control reaction: 2-hydroxyacetophenone (1.0 mmol), KBr (4.0 mmol), H<sub>2</sub>O<sub>2</sub> (16.0 mmol) and H<sub>2</sub>O (5 mL).

<sup>d</sup>Control reaction with HClO<sub>4</sub>: 2-hydroxyacetophenone (1.0 mmol), KBr (4.0 mmol), H<sub>2</sub>O<sub>2</sub> (16.0 mmol), HClO<sub>4</sub> (4.0 mmol) and H<sub>2</sub>O (5 mL).

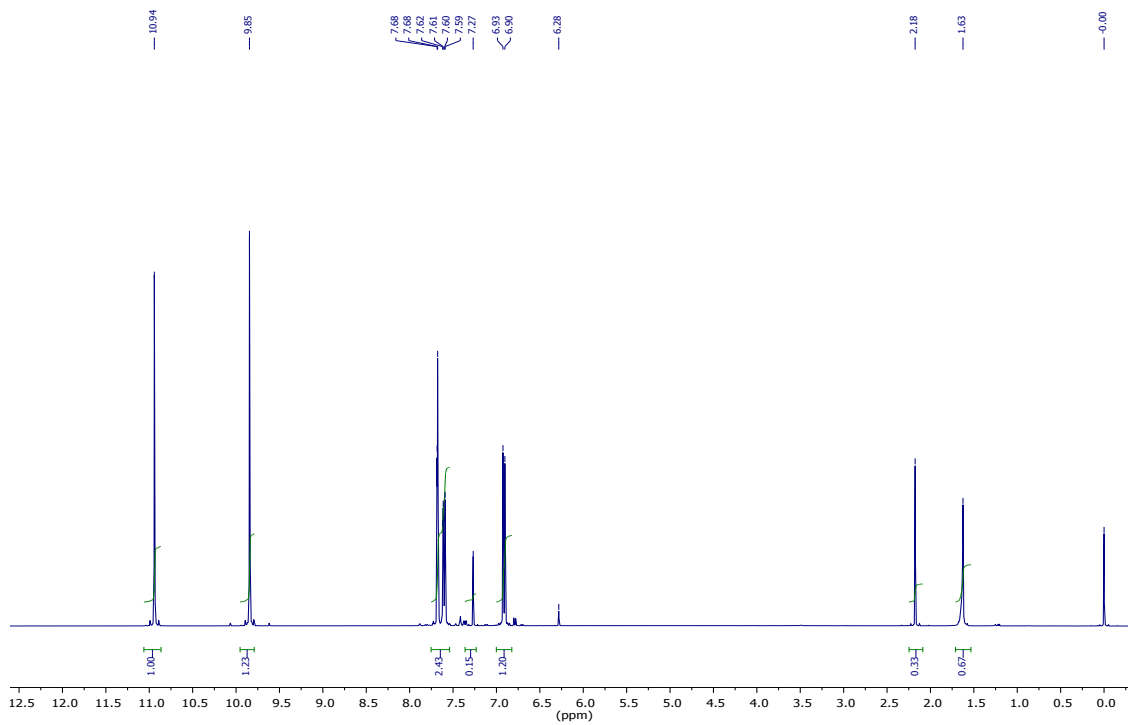

**Fig S1. <sup>1</sup>H NMR of 5-bromo-2-hydroxybenzaldehyde**

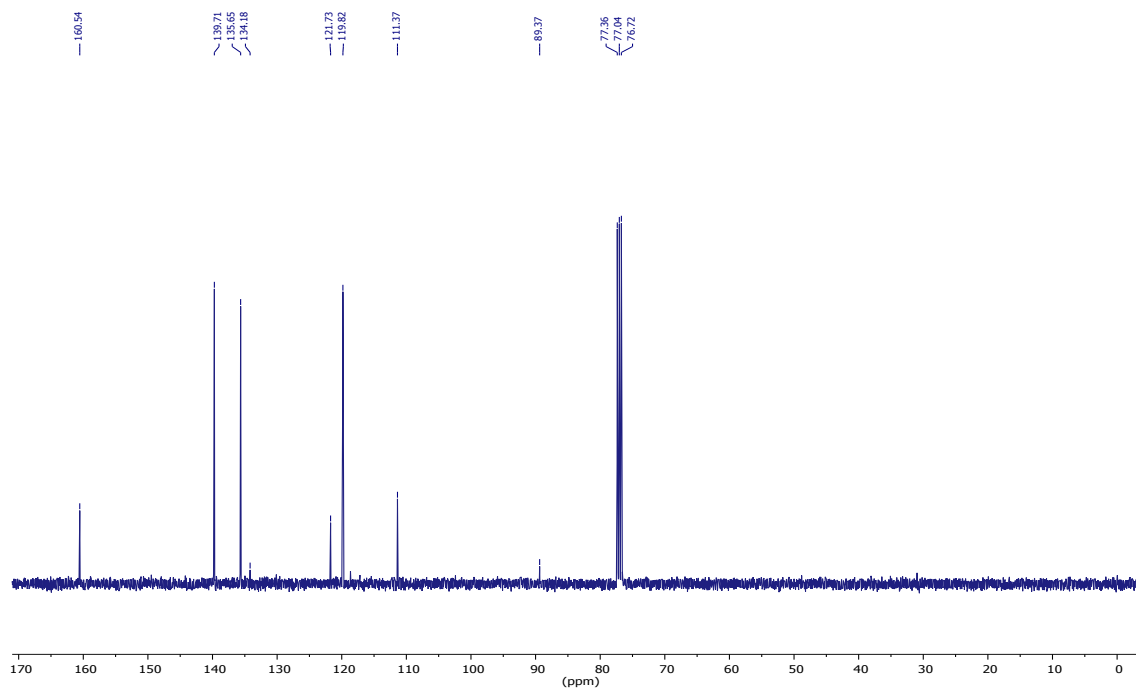

**Fig S2.  $^{13}\text{C}$  NMR of 5-bromo-2-hydroxybenzaldehyde**

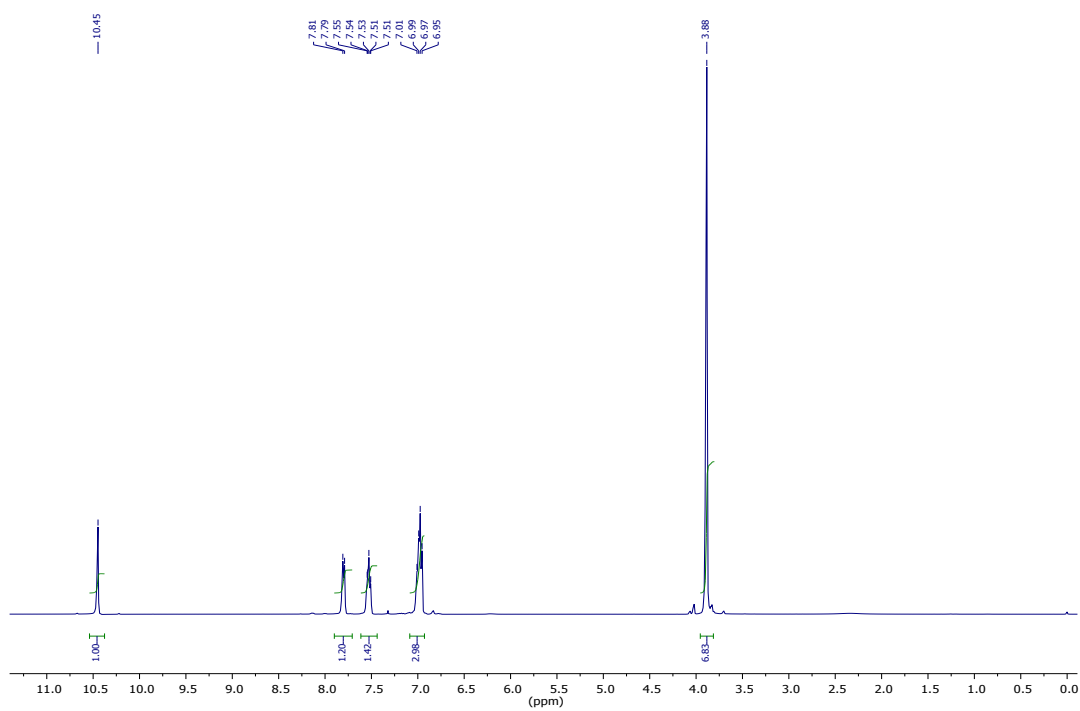

**Fig S3.  $^1\text{H}$  NMR of 2-bromo-1-(2-hydroxyphenyl) ethan-1-one**

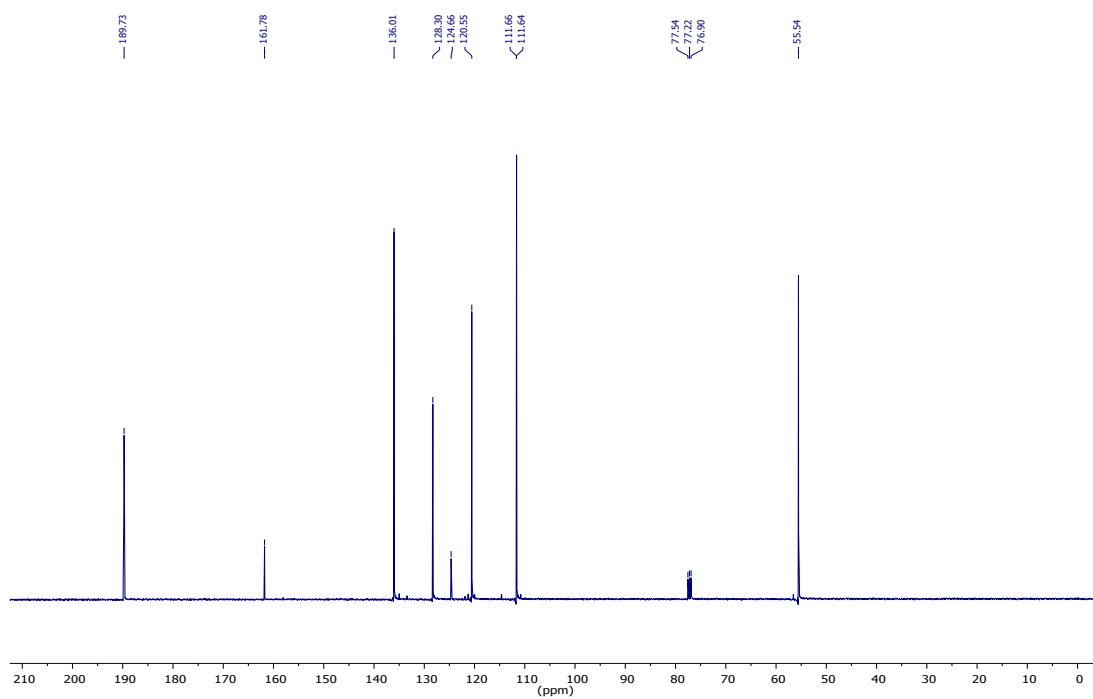

**Fig S4.  $^{13}\text{C}$  NMR of 2-bromo-1-(2-hydroxyphenyl) ethan-1-one**

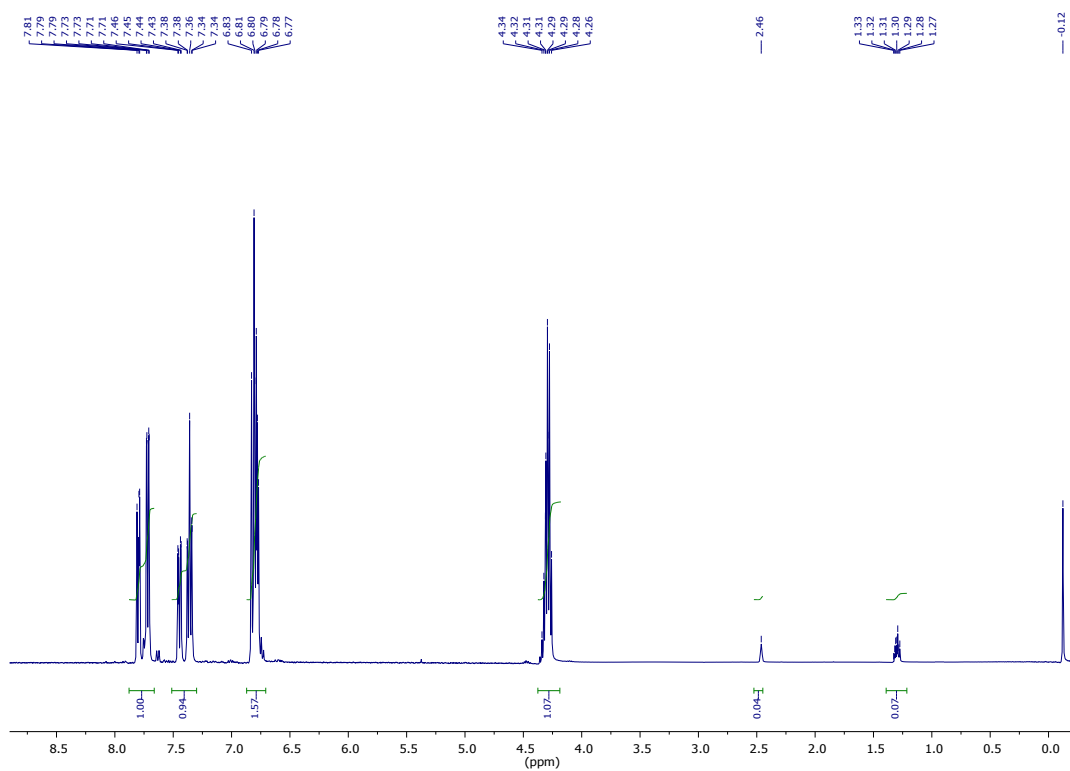

**Fig S5.**  $^1\text{H}$  NMR of ethyl 5-bromo-2-hydroxybenzoate

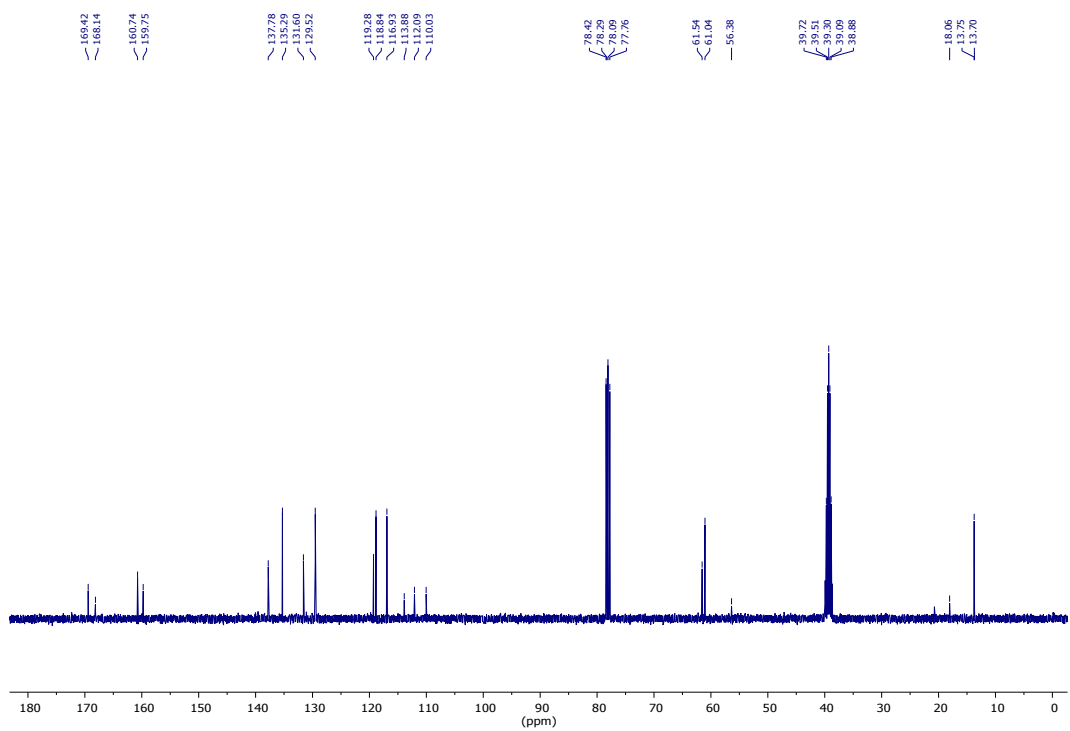

**Fig S6.**  $^{13}\text{C}$  NMR of ethyl 5-bromo-2-hydroxybenzoate

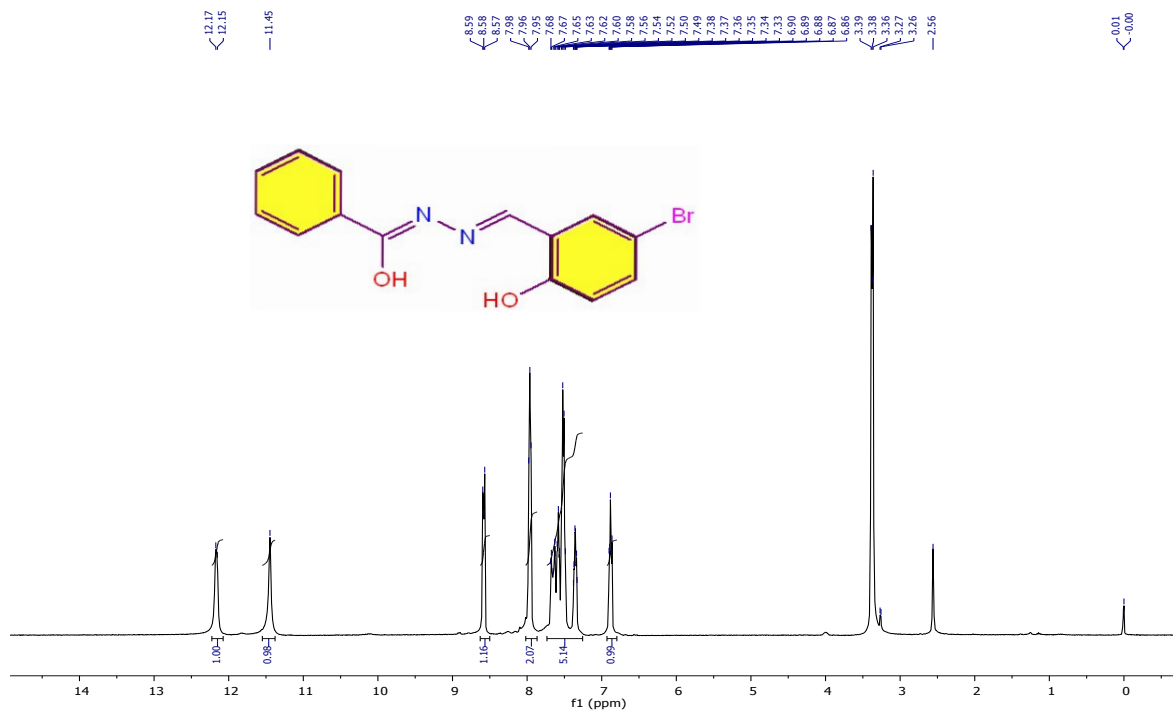

Fig S7. <sup>1</sup>H NMR of ligand

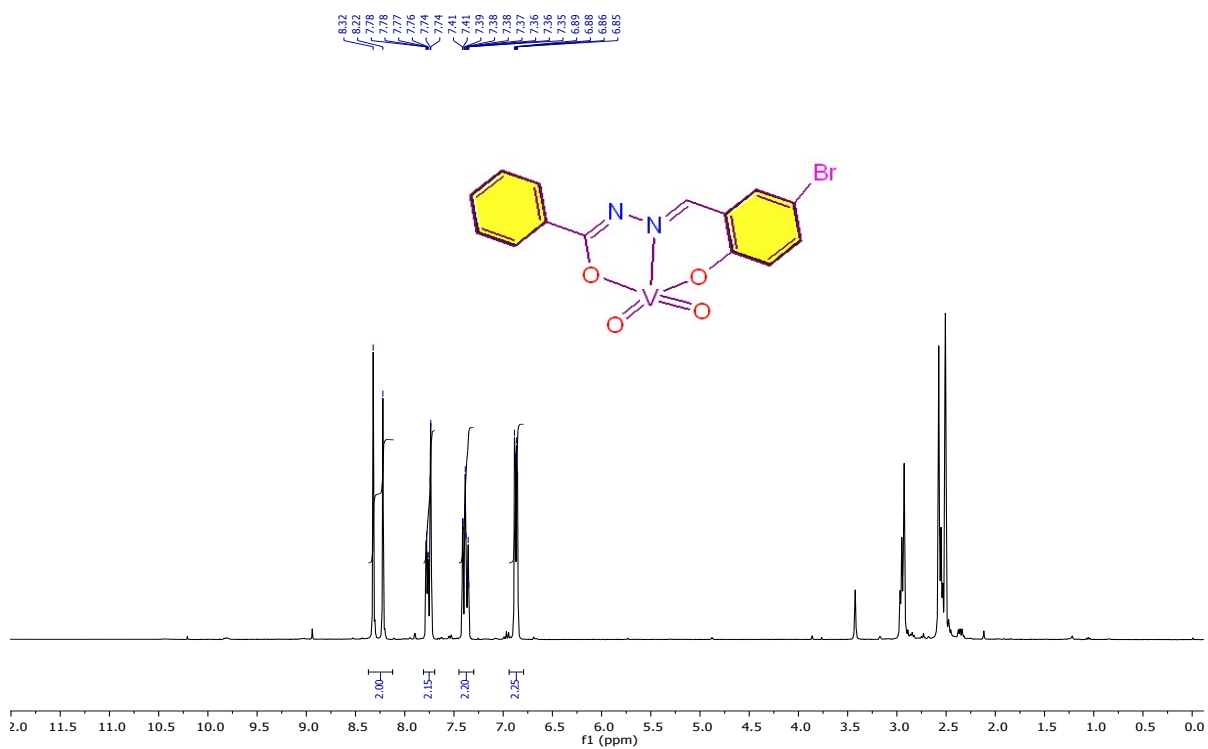

Fig S8. <sup>1</sup>H NMR of complex

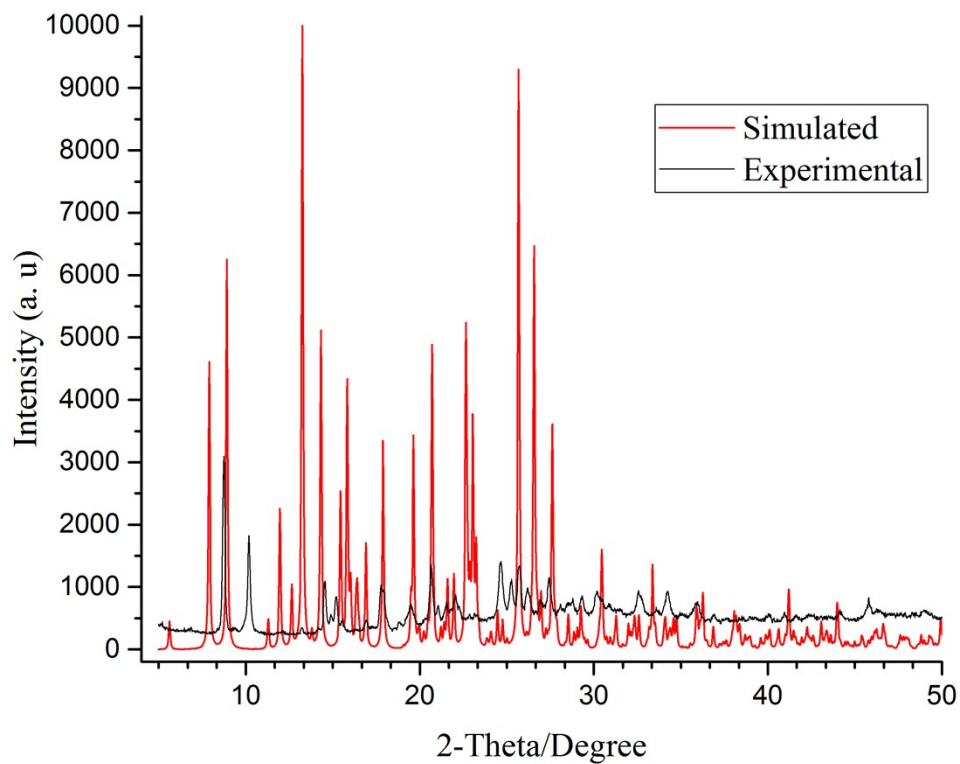

Fig. S9. Experimental and simulated powder XRD patterns of VO<sub>2</sub>-L metallogel

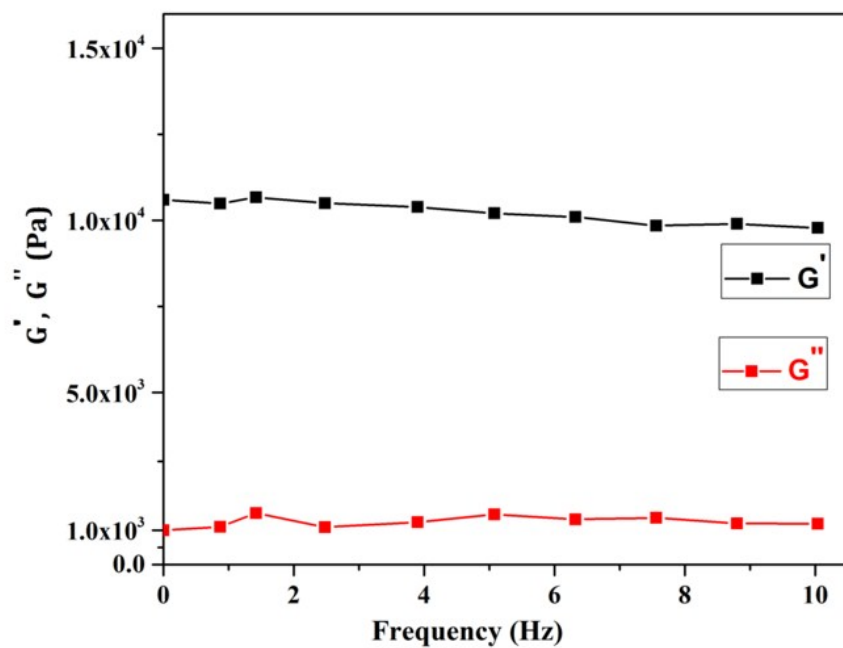

Fig S10a. Variation of storage modulus (G') and loss modulus (G'') with frequency

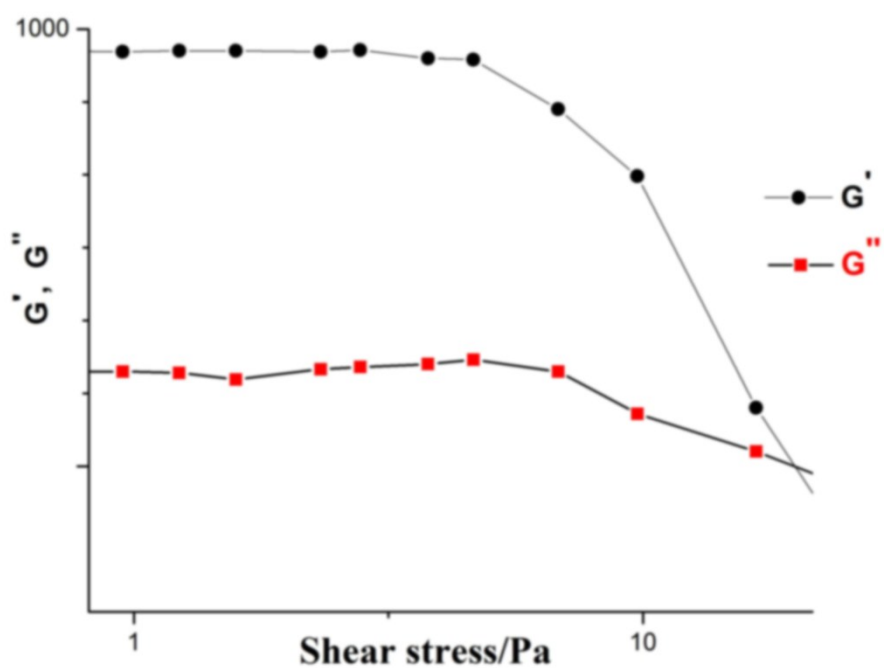

Fig S10b. Variation of storage modulus ( $G'$ ) and loss modulus ( $G''$ ) with shear stress

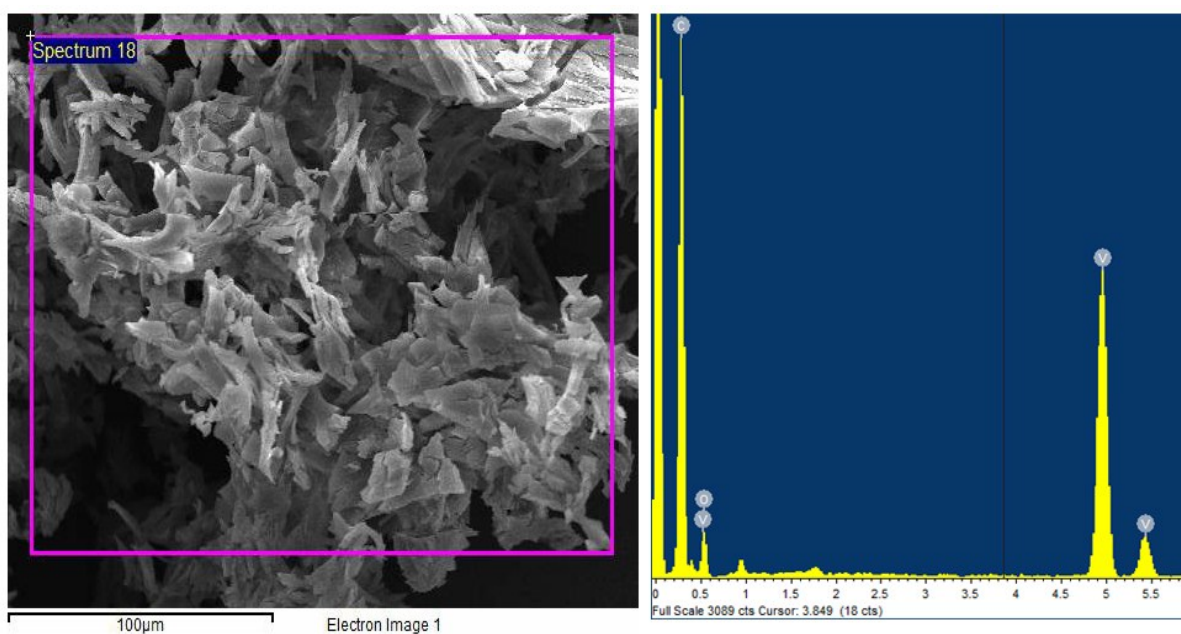

Fig S11. SEM image of  $\text{VO}_2\text{-L}$  metallogel and its corresponding EDS spectrum
